# Supplementary material
Source: publisher figshare collection journal article supplement (https://geolsoc.figshare.com/ndownloader/files/5421539)
Supplement: Supplementary file 1 [file 5421539]

Appendix 2C,,,
Source rock properties - Restricted marine post-rift super-sequence,,References,
Sergipe-Alagoas,Riachuelo Fm -> Potential unproven PS,,
,Dark grey marls and calcareous shales,"Koutsoukos et al., 1991a,b; ANP, 2009",
,TOC Avg: 3-5 %; TOC Max: 13 %,,
,Type II kerogen,,
,TOC Max: 12 %,,
,HI Max: 709 mg HC/g TOC,,
,S2 Max: 46 mg HC/g rock,,
,Equivalent to Regência Fm in Espirito Santo basin,,
,,,
Almada-Camamu,Algõdoes Fm -> Potential unproven PS,,
,Neritic carbonates deposited in a narrow and shallow sea,"Gonçalves et al., 2000",
,Equivalent to Regência Fm carbonates/shales in Esprito Santo basin,,
,,,
Jequitinhonha,Regência Fm -> Regência - Mariricu (!),,
,TOC Avg: 2 %,"Gonçalves et al., 1994; ANP, 2002c",
,HI Avg: 500 - 600 mg HC/g TOC,,
,S2 Avg: 5 - 6 mg HC/g rock,,
,Equivalent to Regência Fm carbonates/shales in Esprito Santo basin,,
,,,
Cumuruxatiba,Regência Fm -> Regência - Urucutuca (!),,
,Type II kerogen,"ANP, 2002a",
,TOC Avg: 1 %; TOC Max: 4 %,,
,Equivalent to Regência Fm carbonates/shales in Esprito Santo basin,,
,,,
Espírito Santo,Regência Fm -> Regência - Sao Mateus/Urucutuca (!),,
,Shallow to deep marine marls,"Gonçalves et al., 1994; ANP, 2002c",
,Type II kerogen,,
,TOC Avg: 0.5 - 2 %,,
,HI Max: 300 mg HC/g TOC,,
,S2 Max: 6 mg HC/g rock,,
,,,
Campos,Macae Fm -> Macae - Upper Cretaceous-Carapebus (.),,
,Shallow marine shelf marls,"Mohriak et al., 1990",
,Type III kerogen,,
,TOC Max: 1 %,,
,Reflecting shallow oxygenated marine shelf environment,,
,,,
,Deeper marine marls,,
,Type II kerogen,,
,TOC Max: 3 %,,
,Equivalent to Regência Fm in Espirito Santo,,
,,,
Santos,Guaruja Fm -> Potential unproven PS,,
,Dark calcilutites intercalated in shallow marine carbonates,,
,Equivalent to Regência Fm in Espirito Santo,,
,,,
Pelotas,,,
,,,
,,,
References,,,
,,,
"ANP (Agência Nacional do Petróleo, Gás Natural e Biocombustíveis), 2002a. Brasil round 4: Cumuruxatiba Basin. http://www.anp.gov.br/brasil-rounds /round4/ round4/workshop/restrito/ingles/ Cumuruxatiba_ing.pdf.",,,
,,,
"ANP (Agência Nacional do Petróleo, Gás Natural e Biocombustíveis), 2002c. Brasil round 4: Jequitinhonha basin. http://www.anp.gov.br/brasil-rounds /round4/ round4/workshop/restrito/ingles/ Jequitinhonha_ing.pdf.",,,
,,,
"ANP (Agência Nacional do Petróleo, Gás Natural e Biocombustíveis), 2009. Brasil round 10: Sergipe-Alagoas basin. http://www.brasil-rounds.gov.br /arquivos/ seminarios/STA_2_Bacia_de_Sergipe_ Alagoas_ingles.pdf.",,,
,,,
"Gonçalves, F.T.T., Mello, M.R. & Netto, A.S.T. 1994. Cretaceous source rocks of the marginal basins south of Bahia: geochemical and paleo-environmental characterization. 3rd simpósio sobre o Cretáceo do Brasil, proceedings, Rio Claro-SP. 55-57. (in Portuguese).",,,
,,,
"Gonçalves, F.T.T., Bedregal, R.P., Coutinho, L.F.C. & Mello, M.R. 2000. Petroleum system of the Camamu-Almada basin: a quatitative modeling approach. In: Mello, M.R. & Katz, B.J. (Eds) Petroleum Systems of South Atlantic Margins. American Association of Petroleum Geologists Memoir, 73, 257-271.",,,
,,,
"Koutsoukos, E.A.M., Mello, M.R., de Azambuja Filho, N.C., Hart, M.B. & Maxwell, J.R. 1991a. The Upper Aptian-Albian succession of the Sergipe basin, Brazil: an integrated paleoenvironmental assessment. American Association of Petroleum Geologists Bulletin, 75, 479-498. ",,,
,,,
"Koutsoukos, E.A.M., Mello, M.R. & de Azambuja Filho, N.C. 1991b. Micropaleontological and geochemical evidence of Mid-Cretaceous dysoxic-anoxic paleoenvironments in the Sergipe-Alagoas basin, Northeastern Brazil. Geological Society, London, Special Publications, 58, 427-447.",,,
,,,
"Mohriak, W.U., Mello, M.R., Dewey, J.F. & Maxwell, J.R. 1990. Petroleum geology of the Campos basin , offshore Brazil. In: Brooks, J. (Ed.) Classic Petroleum Provinces. Geological Society, London, Special Publications, 50, 119-141.",,,
